# Supplementary material
Source: PubMed Central journal article supplement (PMC8091546)

**Supplementary Figure 1. Negative control.** Control staining in the absence of primary antibodies is negative in the conditions tested on SVZ glioblastoma tissue sections (**A**), NCH421K GSC tumor spheres (**B**) and U87 differentiated glioblastoma cells (**C**). DAPI is used for nuclear counterstaining. Scale bar: A,C, 100  $\mu\text{m}$ ; B, 50  $\mu\text{m}$ . Abbreviations: DAPI, 4',6-diamidino-2-phenylindole; GSC, glioblastoma stem cell; SVZ, subventricular zone.

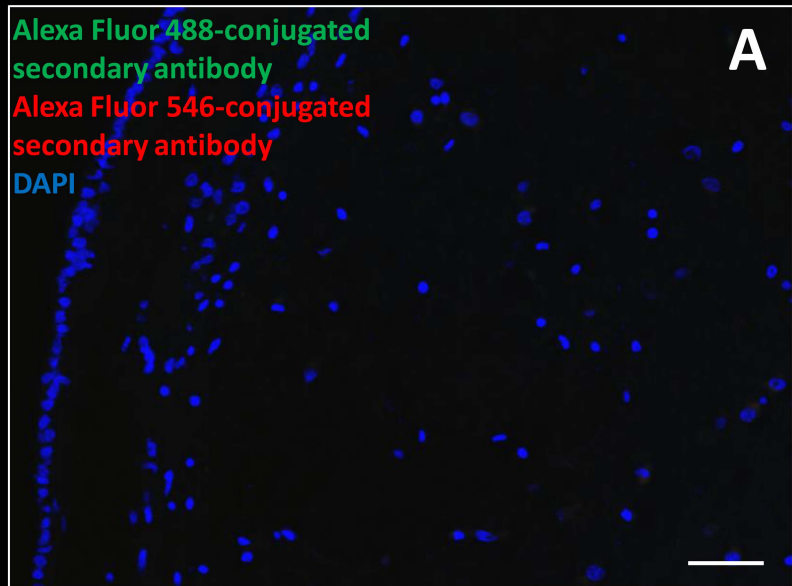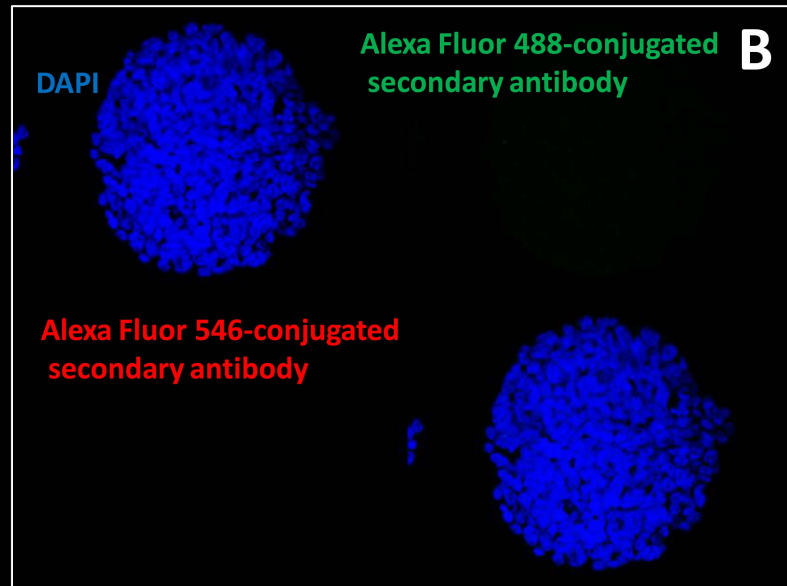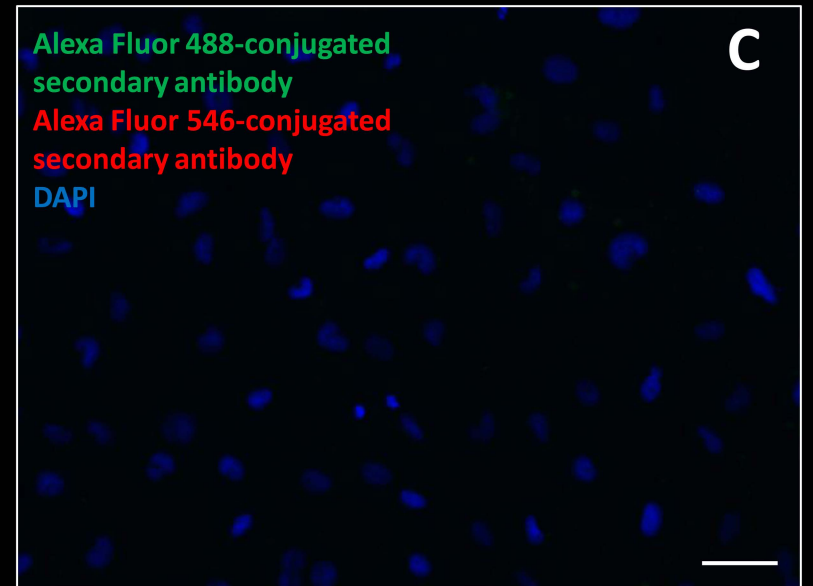

Supplement: sj-pdf-1-jhc-10.1369_0022155421994679.pdf [file sj-pdf-1-jhc-10.1369_0022155421994679.pdf]
